# Supplementary material for: Genetic and phylogenetic analysis of dissimilatory iodate-reducing bacteria identifies potential niches across the world’s oceans
Source: PubMed Central journal article supplement (PMC8692401; doi:10.1038/s41396-021-01034-5), 2021-07-02

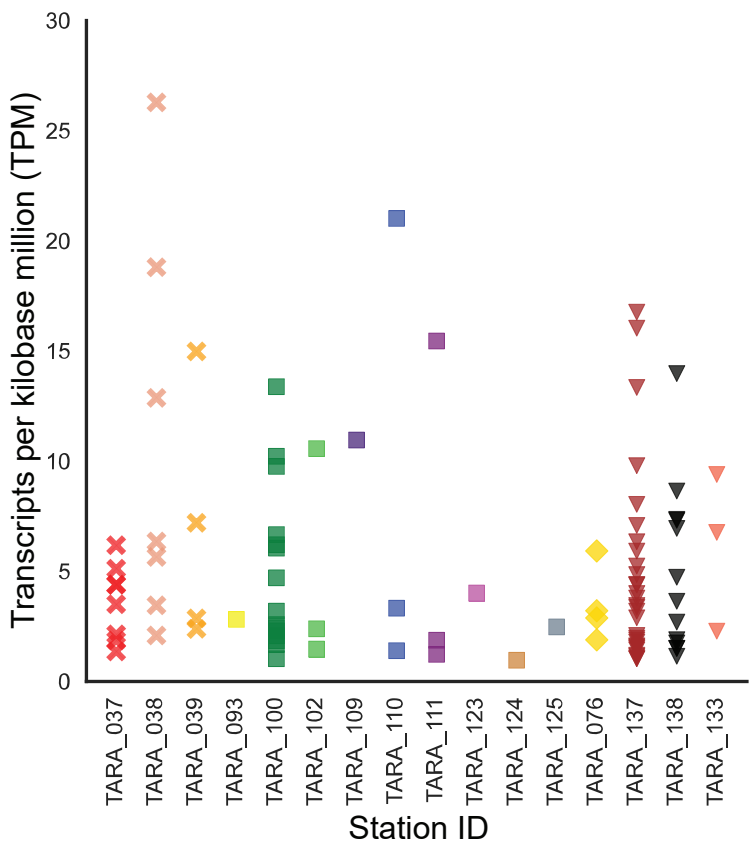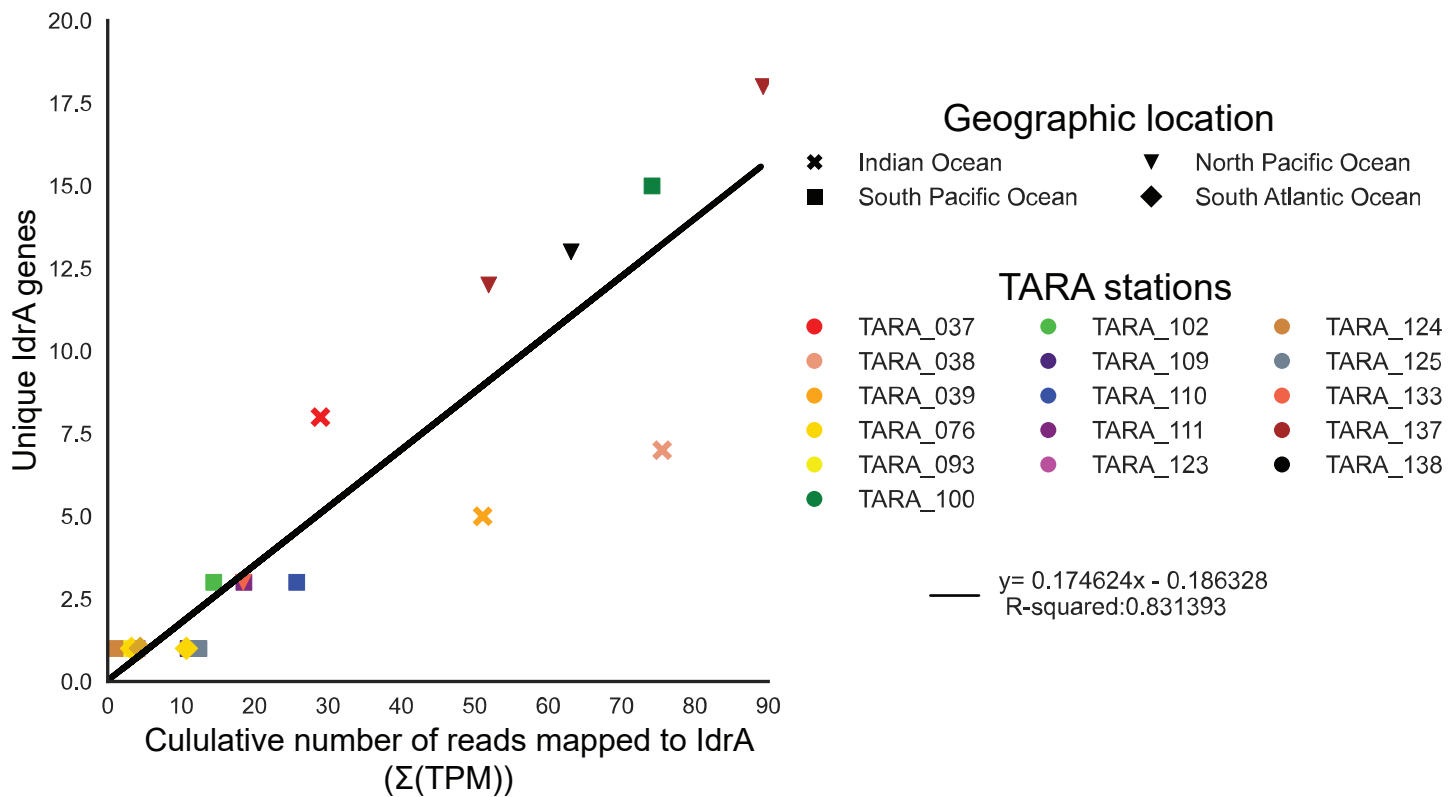

Supplement: 41396_2021_1034_MOESM4_ESM.pdf [file 41396_2021_1034_MOESM4_ESM.pdf]
